# Supplementary material for: Quadruplex-and-Mg2+ Connection (QMC) of DNA
Source: PubMed Central journal article supplement (PMC4533012; doi:10.1038/srep12996), 2015-08-12
Supplement: srep12996-s1.pdf [file srep12996-s1.pdf]

## SUPPLEMENTARY INFORMATION

### Quadruplex-and-Mg<sup>2+</sup> Connection (QMC) of DNA

Besik Kankia

Department of Chemistry and Biochemistry, The Ohio State University, Columbus OH 43210,  
USA

E-mail: [kankia.1@osu.edu](mailto:kankia.1@osu.edu), Telephone: 614-688-8799, Fax: 614-688-5402

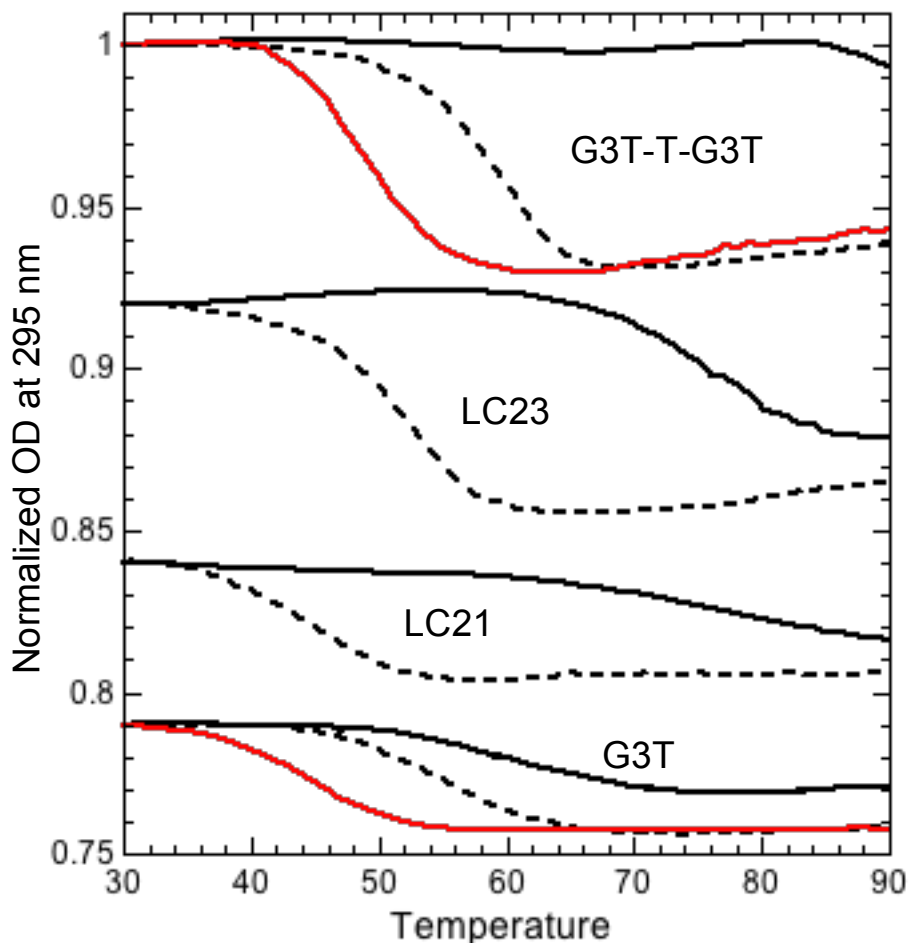

**Figure S1.** UV meltings of (G3T)<sub>2</sub> variants in 0.1 mM K<sup>+</sup> in the absence (dashed lines) and presence of 1 mM Mg<sup>2+</sup> (black solid lines) and 100 mM Cs<sup>+</sup> (red lines). G3T-T-G3T has thymidine in the middle, which inhibits uninterrupted tetrahelical structure in the absence of Mg<sup>2+</sup> ions. Adding Mg<sup>2+</sup> results in more than 40 °C stabilization, which we attribute to recovery of the fold. LC23 and LC21 represent truncated versions, missing G and TGGG at the 3'-end. Both variants reveal 25-30 °C stabilization effect upon adding Mg<sup>2+</sup> ions. While Mg<sup>2+</sup> strongly stabilizes (G3T)<sub>2</sub> variants, the stabilization effect on the G3T monomer (bottom) is only ~ 5 °C. Cs<sup>+</sup> ions were employed to demonstrate that Mg<sup>2+</sup> stabilization effect is not just an ionic effect. Cs<sup>+</sup> ions demonstrate even destabilization due to decreasing the effective concentration of K<sup>+</sup> ions. For clarity, the curves corresponding to LC23, LC21 and G3T are offset by 0.08, 0.16 and 0.21 OD units, respectively.

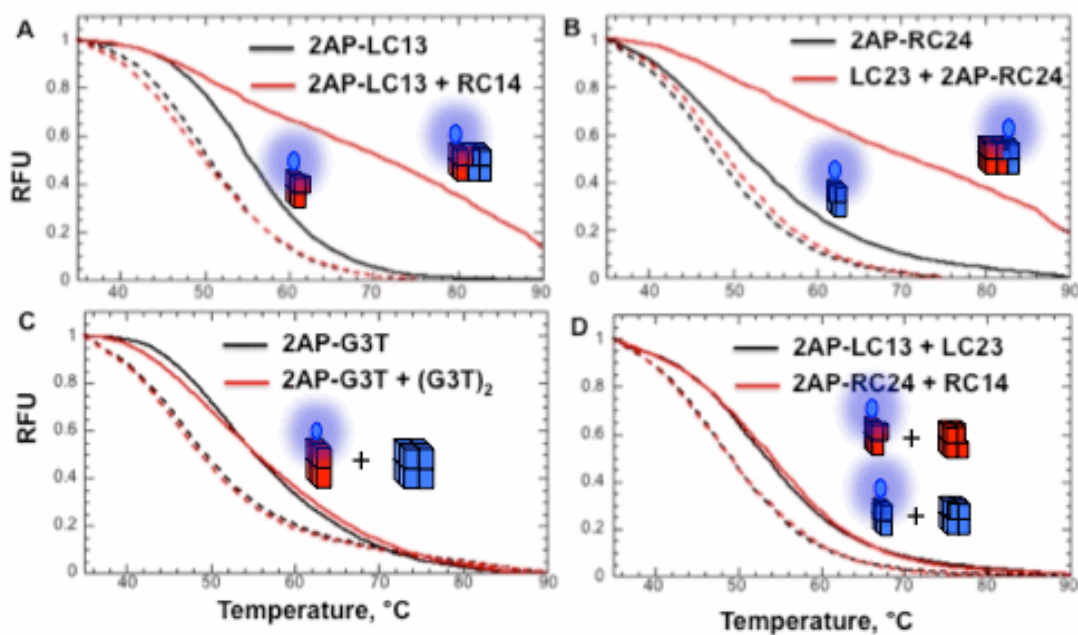

**Figure S2.** Fluorescence melting experiments in 0.1 mM  $K^+$  in the absence (dashed lines) and presence (solid lines) of 1 mM  $Mg^{2+}$ . Panels A, B and C represent the melts of the matching QMC partners LC13/RC14, LC23/RC24 and LC12/RC13, respectively. Panel D demonstrates cross-binding experiment between LC13/RC14 and LC23/RC24. The stabilization effect of  $Mg^{2+}$  on the separate connectors, blunt-ended system (panel C) and cross-binding partners (panel D) demonstrates a moderate,  $\sim 5$  °C, increase in  $T_m$ . Only QMC partners with the shape complementarity or locking mechanism reveal strong stabilization (panels A and B) characteristic of QMC formation.

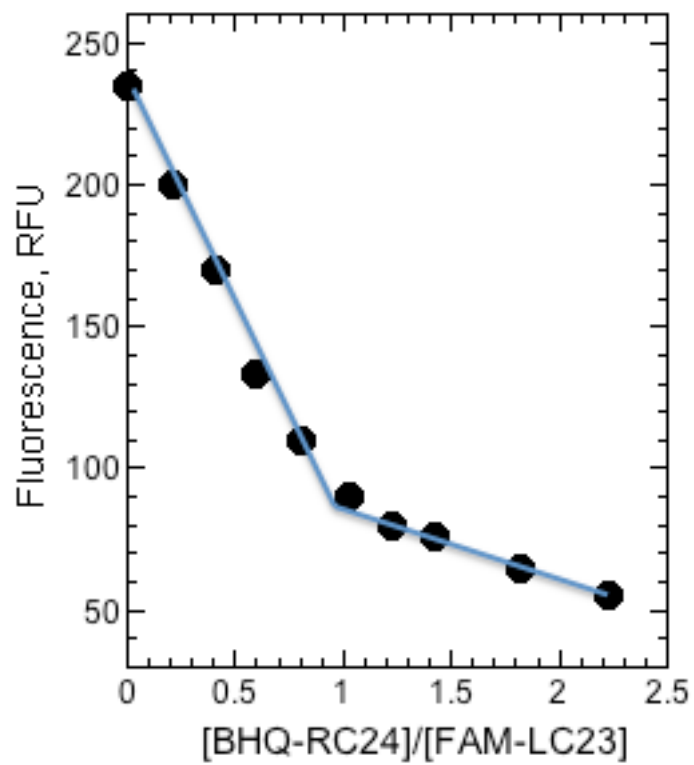

**Figure S3.** Fluorescence titration curves of FAM-LC23 with BHQ-RC24 at 50 °C. Buffer: 5 mM KCl, 2 mM MgCl<sub>2</sub>, 10 mM Tris-HCL, pH 8.7. Initial concentration fo FAM-LC23 is 250 nM.

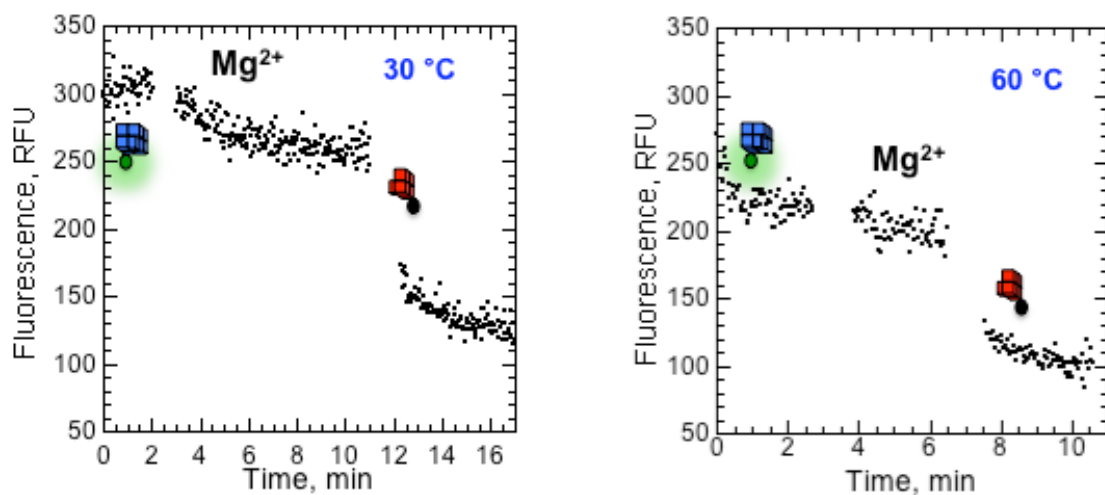

**Figure S4.** Fluorescence effects of FAM-LC23 upon adding 10 mM MgCl<sub>2</sub> and BHQ-RC24. Buffer: 5 mM KCl, 10 mM Tris HCl; [FAM-LC23] = 250 nM, [BHQ-RC24] = 500 nM.

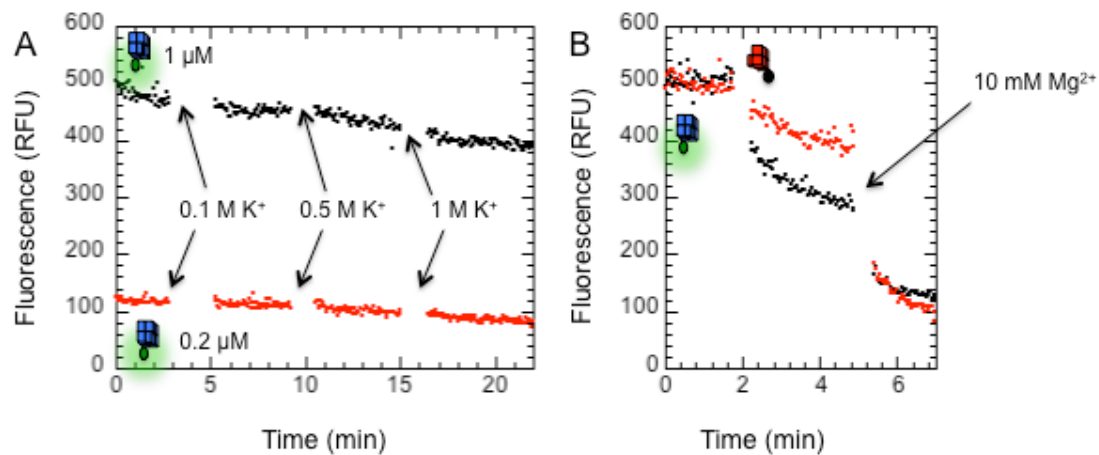

**Figure S5.** Role of  $\text{K}^+$  ions in QMC. (A) Titration of 1  $\mu\text{M}$  (black) and 0.2  $\mu\text{M}$  (red) FAM-LC23 by KCl. Initial concentration of KCl is 1 mM. (B) Quenching of FAM-LC23 in 0.1 M KCl (red) and 1 M KCl (black) upon adding BHQ-RC24. To complete the quenching, 25 mM  $\text{MgCl}_2$  was added around 5 min.  $[\text{FAM-LC23}] = 1 \mu\text{M}$ ,  $[\text{BHQ-RC24}] = 1.25 \mu\text{M}$ .

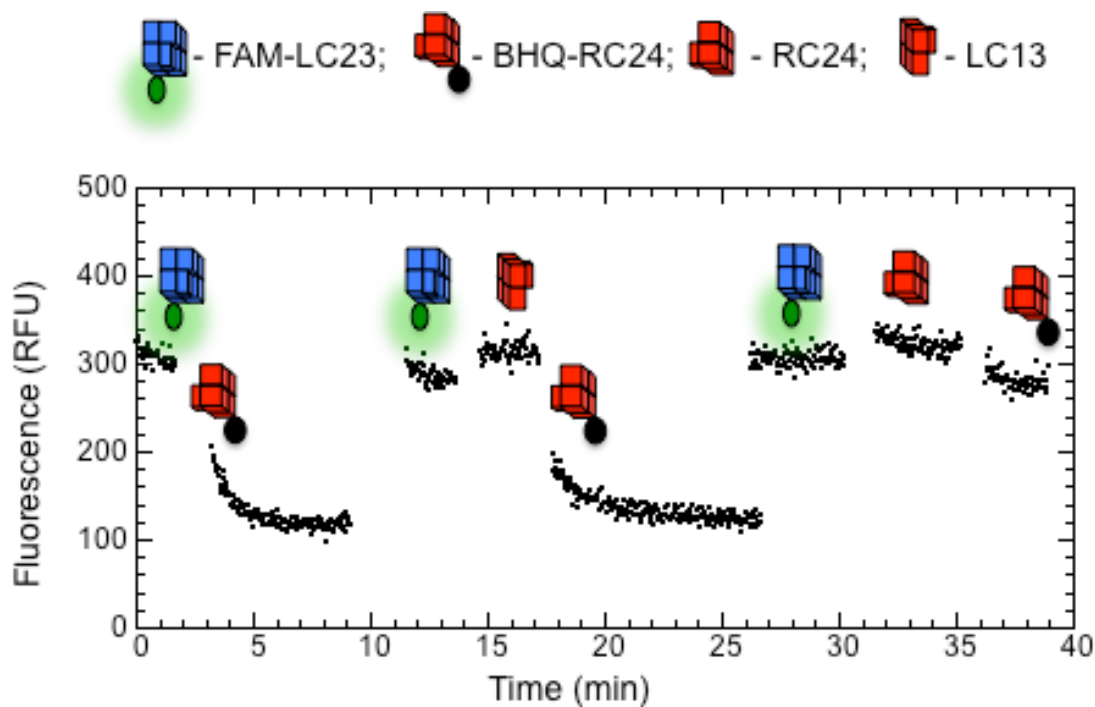

**Figure S6.** Effect of mismatched and matched binding partners on QMC (LC23/RC24) formation at 60 °C. The graph presents three mixing experiments. All experiments starts with 250 nM FAM-LC23 dissolved in 5 mM KCl and 2 mM MgCl<sub>2</sub>. Left experiment is the positive control demonstrating rapid fluorescence quenching upon adding matched binding partner with tagged quencher, 500 nM BHQ-LC24. In the middle experiment, before adding BHQ-LC24, mismatched or cross-binding partner from another QMC connection (see Fig. 1), LC13 (2 μM), was added. However, LC13 could not interfere into the QMC formation upon addition of BHQ-LC24. This clearly indicates that the cross-binding partners do not form a stable complex. In the last experiment, matching LC24 without tagged quencher (“cold” version of BHQ-LC24) was used, which completely inhibited QMC formation.

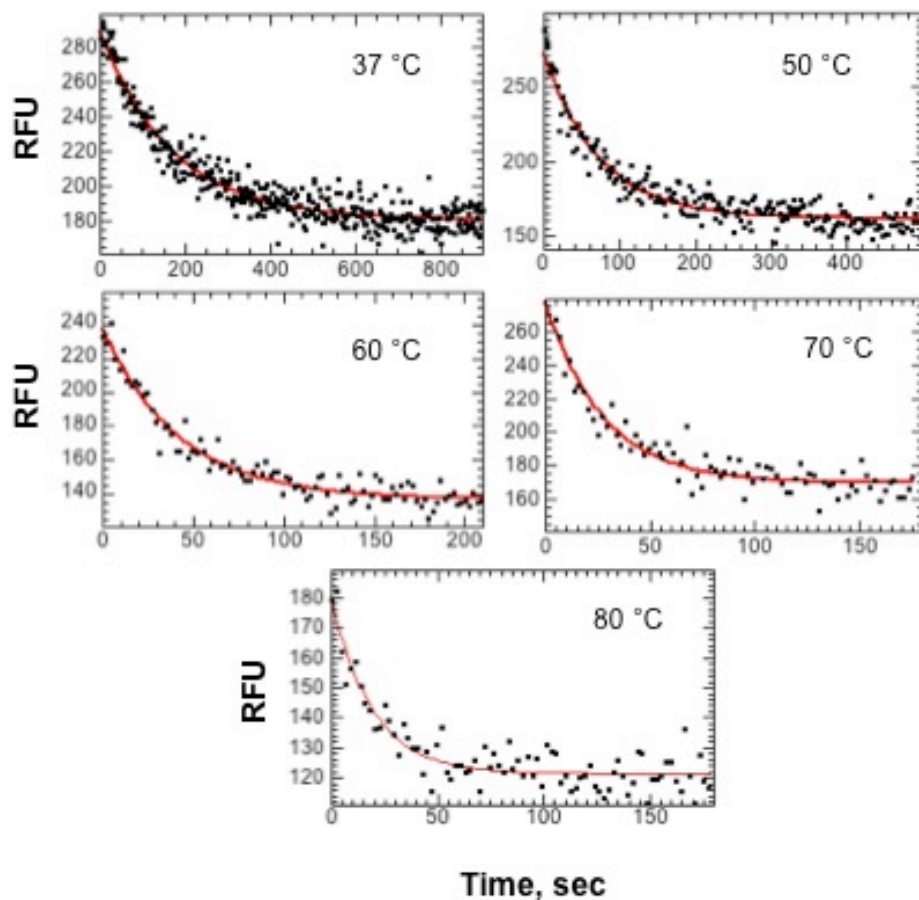

**Figure S7.** Stopped-flow kinetics of QMC formation at different temperatures initiated by mixing equal volumes of FAM-LC23 and BHQ-RC24 dissolved in 5 mM KCl, 10 mM MgCl<sub>2</sub> and 10 mM Tris-HCl. The on-rate constants,  $k$ , were estimated from a single-exponential fit (red) of the experimental data.
